# Supplementary material
Source: Springer Nature journal article supplement (https://www.springermedizin.de/resource/supplementary/12884_2013_1241_MOESM1_ESM.pdf/9459018)

## Normalization of Abuse

### Providers

Learn abuse as students

Practice/observe abuse as professionals

### Health System

Fosters demoralizing atmosphere for providers/patients

Provides little recourse against abuse

### Clients

Experience, observe, expect abuse. Abuse as component of authority

## Health System Undermined

### Clients

Lack trust in the health system

View facilities as inhospitable; providers as rude

Feel unqualified to redress abuse

Grow skeptical of health messaging for facility delivery

## Dangerous Delivery Practices Reinforced

### Clients

Deliver at home

Delay departure to facilities

Depart facility early

Client behaviors reinforce provider view of clients as "ignorant"

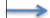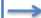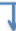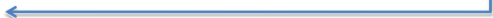

Supplement: MOESM1 [file 9459018]
